# Supplementary material for: Organism body size structures the soil microbial and nematode community assembly at a continental and global scale
Source: PubMed Central journal article supplement (PMC7747634; doi:10.1038/s41467-020-20271-4), 2020-12-17
Supplement: 41467_2020_20271_MOESM1_ESM.pdf [file 41467_2020_20271_MOESM1_ESM.pdf]

## Supplementary Information

### Organism body size structures the soil microbial and nematode community assembly at a continental and global scale

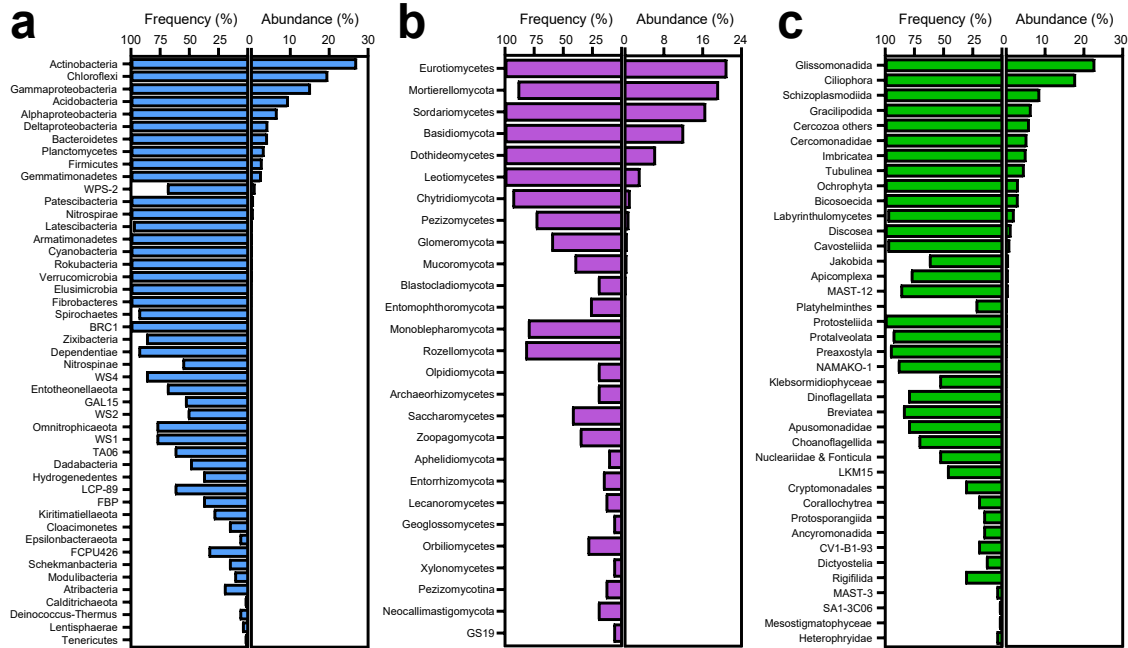

**Supplementary Fig. 1. Relative frequency and relative abundance of each group of bacterial (a), fungal (b), and protistan communities (c). Left panel: the proportions of sampling sites at which the groups were present. Right panel: the average relative abundances of each group. Blue, purple and green bars indicate bacteria, fungi and protists, respectively.**

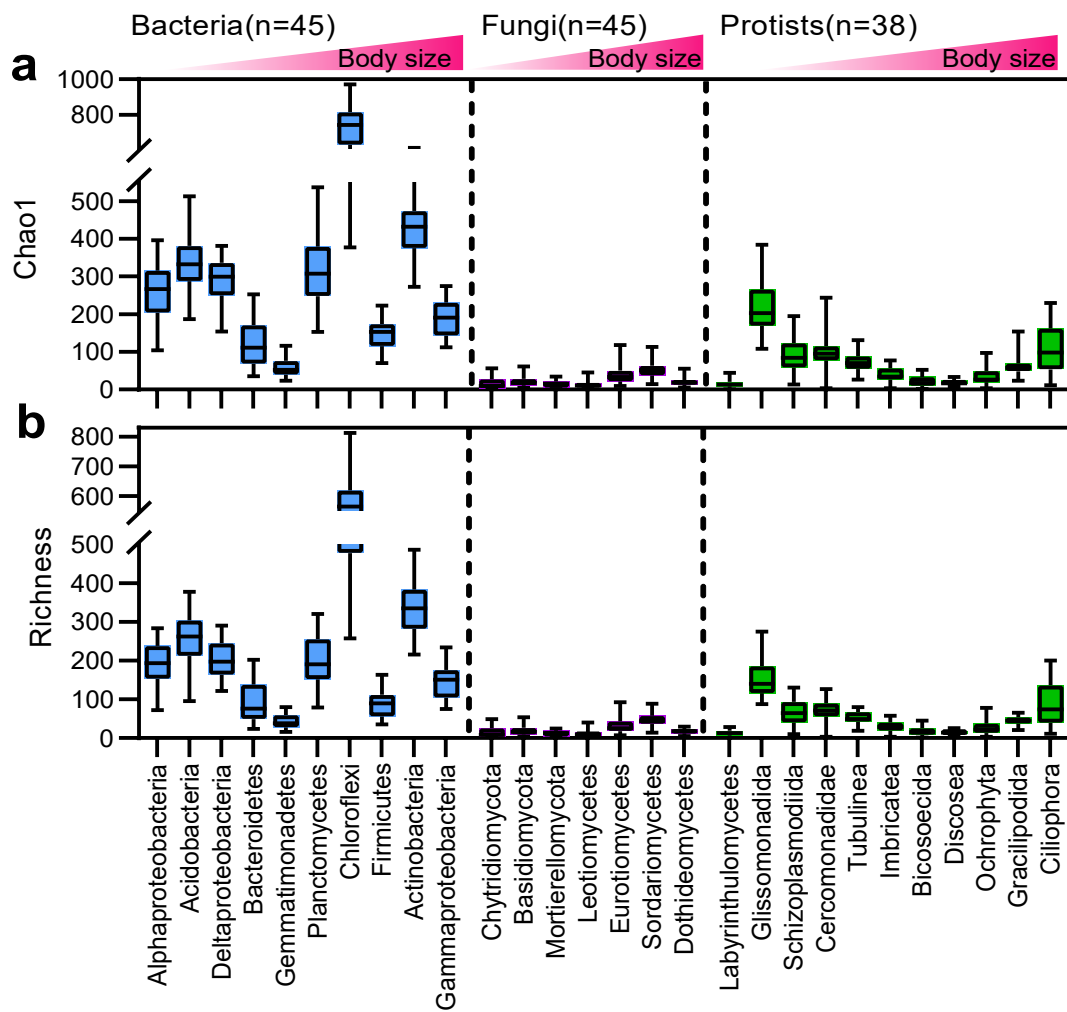

**Supplementary Fig. 2. Alpha-diversity indices of soil microbiomes.** The Chao1 index (a) and richness (b) of 28 organism groups, including bacteria (10 groups), fungi (7 groups) and protists (11 groups). The body size of the organism group increases from the left to the right in each plot. Blue, purple and green bars indicate bacteria, fungi and protists, respectively. Box plots indicate median (middle line), 25th, 75th percentile (box) and 5th and 95th percentile (whiskers). n represents the number of samples.

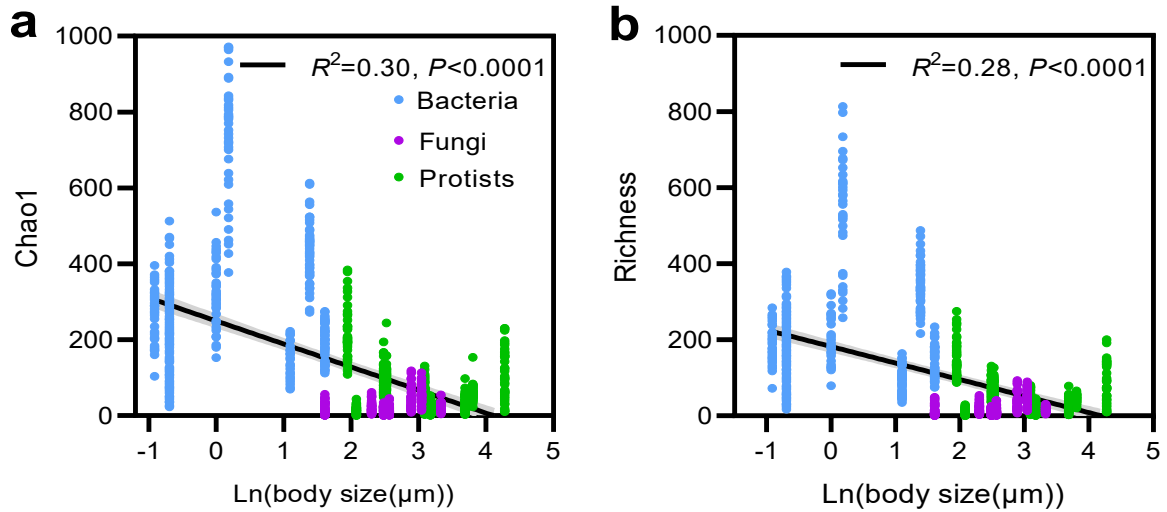

**Supplementary Fig. 3. Correlation analyses between alpha-diversity indices and the logarithm of body sizes.** The relationships between the logarithm of body sizes and Chao1 index (**a**) and richness (**b**). The statistics are for the regression of all data points. Lines represent the least squares regression fits and shaded areas represent the 95% confidence intervals. The one-sided  $F$  test and two-sided  $t$  test are applied with the calculated  $P$  values.

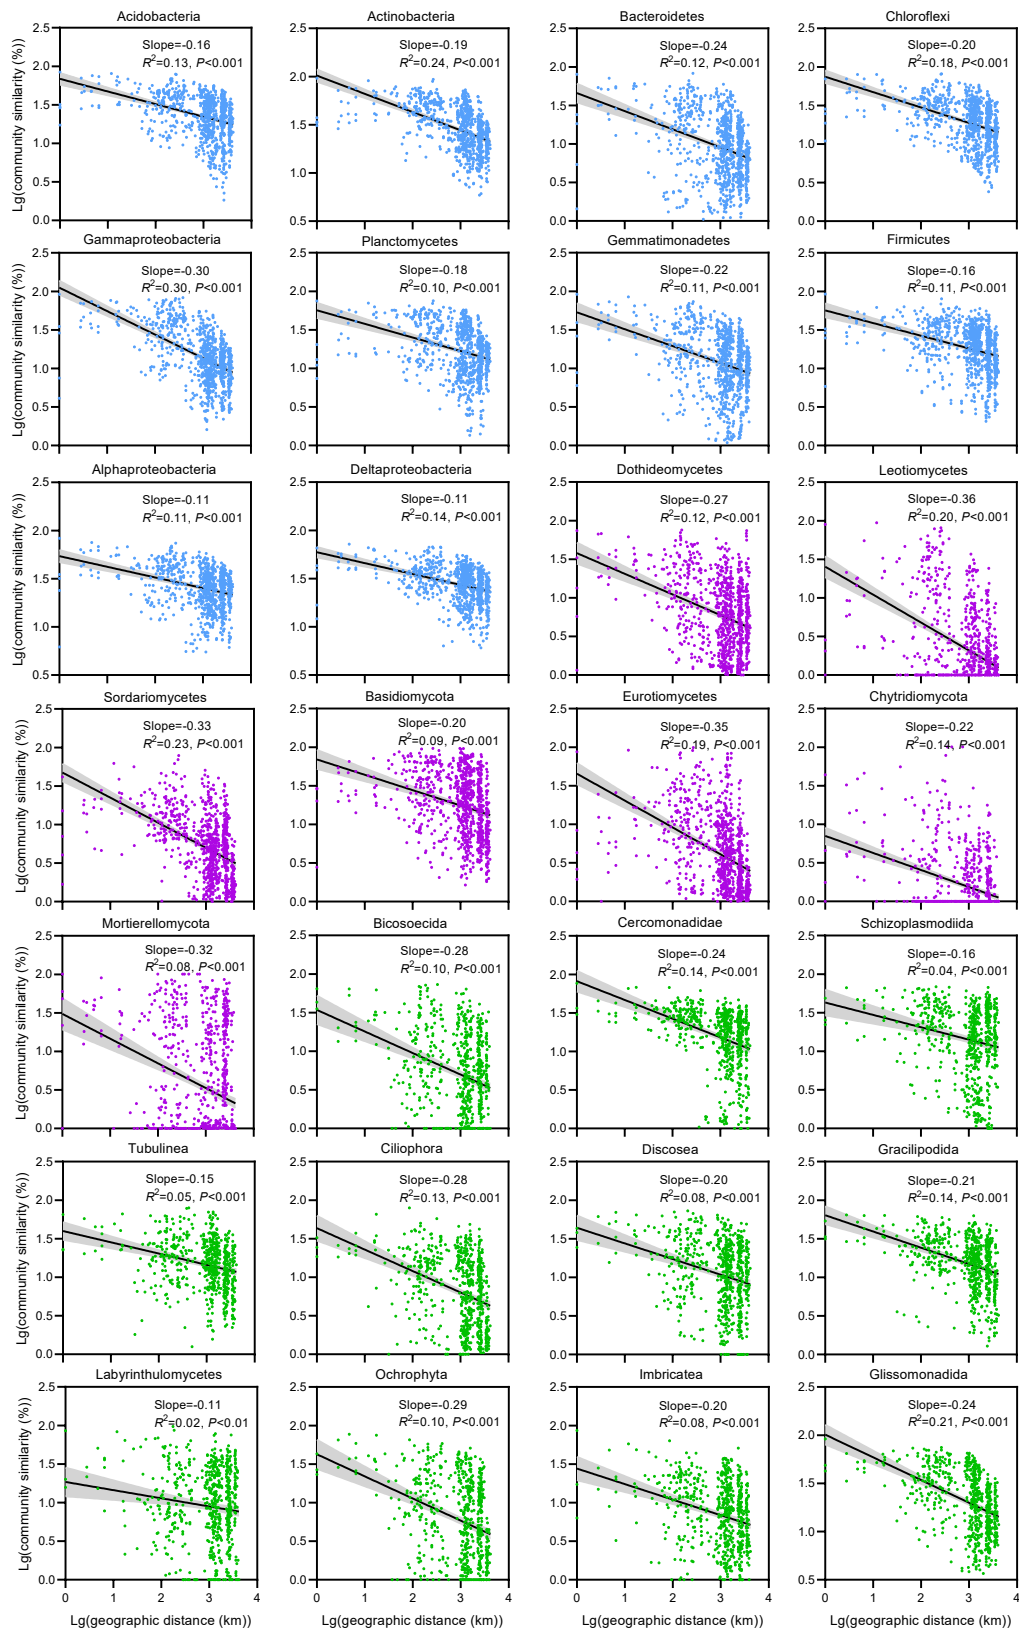

**Supplementary Fig. 4. Distance-decay relationships of the 28 organism groups.** The 28 organism groups include bacteria (10 groups), fungi (7 groups), and protists (11 groups). Blue,

purple and green indicate bacteria, fungi and protists, respectively. The statistics are for the regression of all data points. Lines represent the least squares regression fits and shaded areas represent the 95% confidence intervals. The one-sided  $F$  test and two-sided  $t$  test are applied with the calculated  $P$  values.

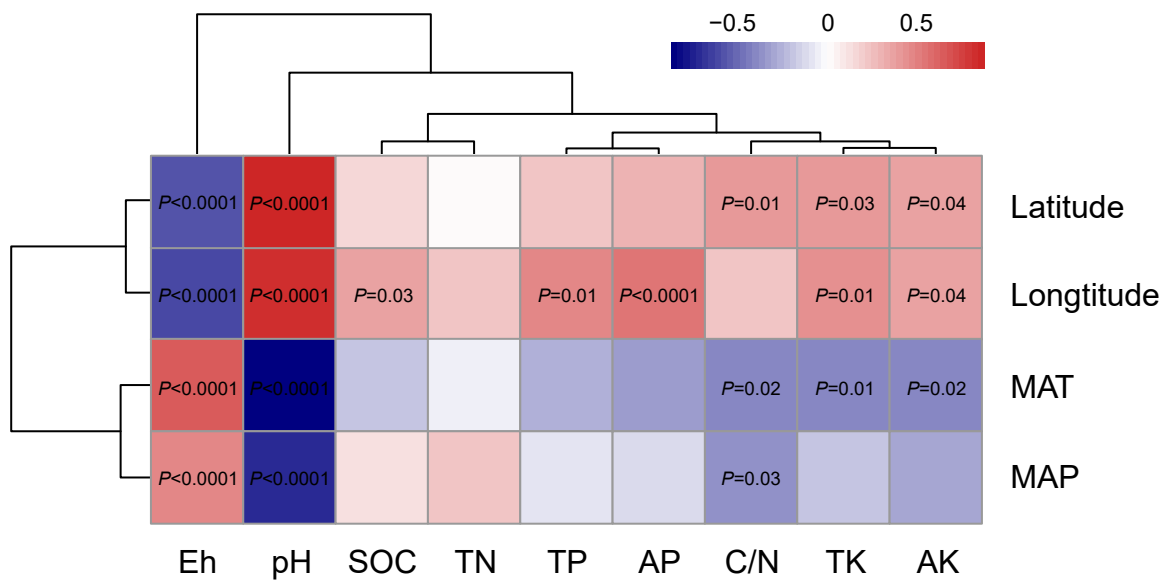

**Supplementary Fig. 5. Correlations between soil environmental and spatial variables.**

Blue colors indicate negative correlation, and red colors indicate positive correlation. The one-sided  $F$  test and two-sided  $t$  test are applied with the calculated  $P$  values.

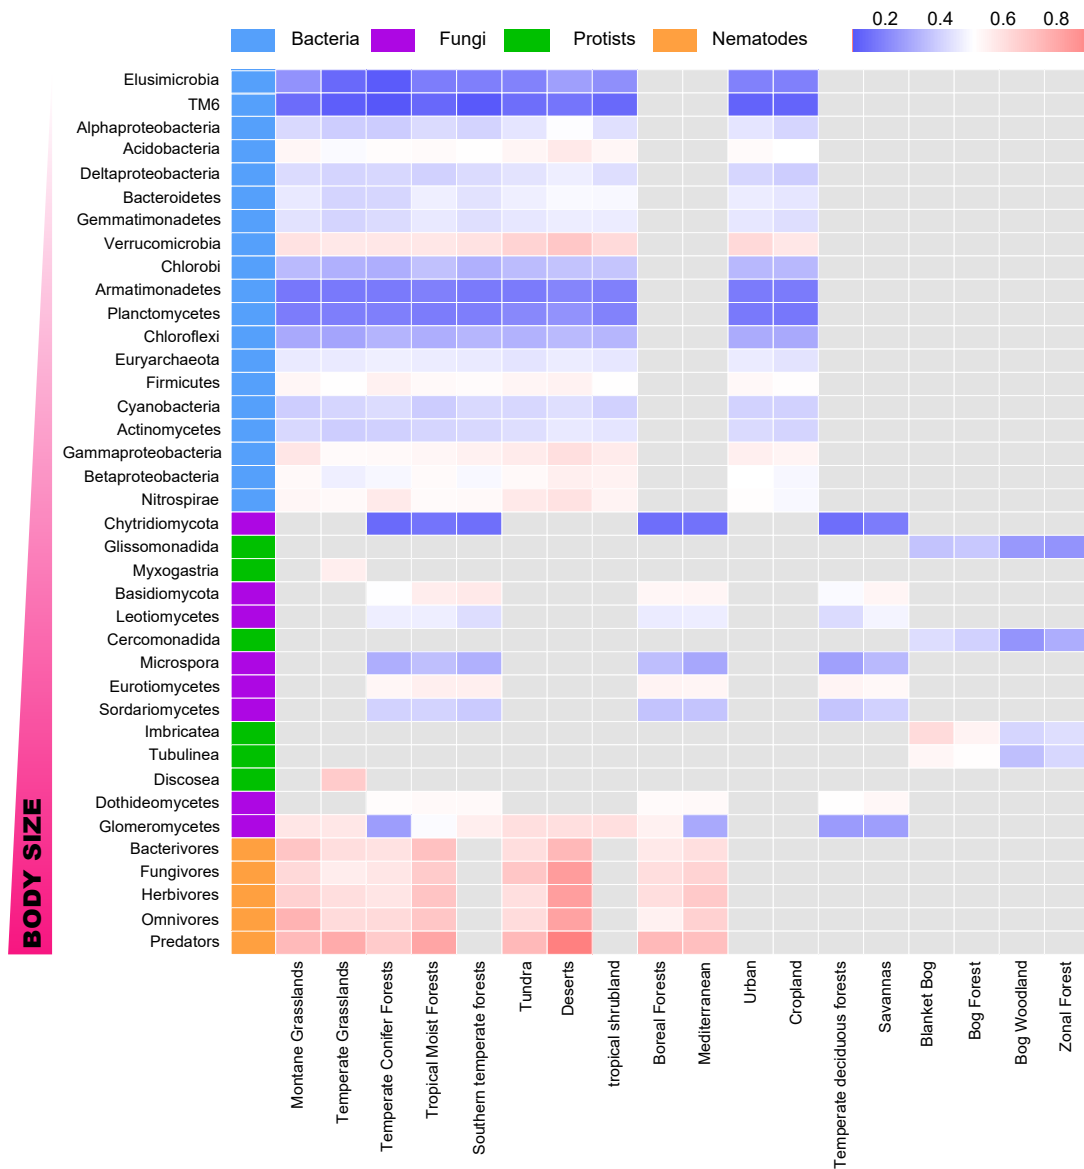

**Supplementary Fig. 6. NDVs values of 38 organism groups across distinct ecosystems.**

The 38 organism groups consist of 19 bacterial groups, 8 fungal groups, 6 protistan groups, and 5 nematode groups. The body size of the organism group increases from the top to the bottom. Grey-shaded cells represent default values.

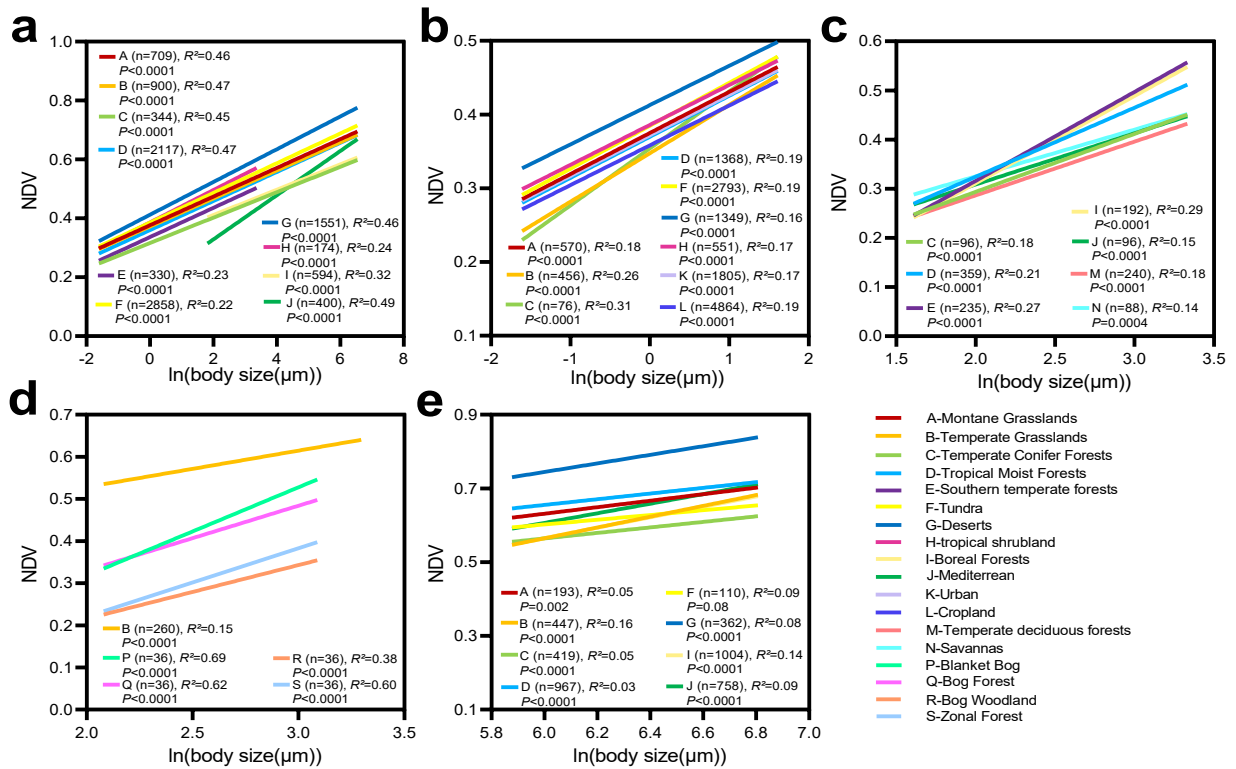

**Supplementary Fig. 7. Relationships between NDVs and the logarithm of body sizes.**

Positive correlations were found when testing all 38 organism groups (a), bacterial groups (b), fungal groups (c), protistan groups (d), and nematode groups (e) in each ecosystem. Capital letters represent different ecosystems. Each line represents the relationship between the logarithm of body size and NDV. The one-sided  $F$  test and two-sided  $t$  test are applied with the calculated  $P$  values.



**Supplementary Table 1.** Variation partitioning of community composition according to environmental and spatial variables.

|                     | E (%) |       | S (%) |       | E&S (%) | Unexplained (%) | Variable environmental selected |
|---------------------|-------|-------|-------|-------|---------|-----------------|---------------------------------|
|                     | $R^2$ | $P$   | $R^2$ | $P$   |         |                 |                                 |
| <b>Bacteria</b>     |       |       |       |       |         |                 |                                 |
| All                 | 2.55  | 0.048 | 9.80  | 0.001 | 21.54   | 66.12           | MAP, MAT, pH                    |
| Acidobacteria       | 3.61  | 0.046 | 6.16  | 0.023 | 19.21   | 71.03           | pH, MAT, TN                     |
| Actinobacteria      | 2.81  | 0.046 | 13.09 | 0.001 | 25.68   | 58.42           | pH, MAT, MAP                    |
| Bacteroidetes       | 3.74  | 0.017 | 9.62  | 0.001 | 15.22   | 71.42           | pH, MAT, TP, MAP                |
| Chloroflexi         | 1.58  | 0.200 | 11.62 | 0.002 | 19.85   | 66.95           | pH, MAT, MAP                    |
| Firmicutes          | 6.97  | 0.001 | 6.97  | 0.001 | 11.58   | 74.49           | pH, MAT, TN                     |
| Planctomycetes      | 0.84  | 0.220 | 12.05 | 0.001 | 15.79   | 71.31           | pH, MAT                         |
| Gemmatimonadetes    | 4.59  | 0.008 | 10.51 | 0.002 | 15.12   | 69.78           | pH, MAT, AK, TN                 |
| Alphaproteobacteria | 2.99  | 0.050 | 4.40  | 0.032 | 16.24   | 76.37           | pH, MAT, AK, TN                 |
| Gammaproteobacteria | 5.55  | 0.007 | 8.87  | 0.003 | 24.81   | 60.77           | pH, MAT, MAP, AK, TP            |
| Deltaproteobacteria | 1.91  | 0.080 | 6.11  | 0.006 | 14.96   | 77.02           | pH, MAT                         |
| <b>Fungi</b>        |       |       |       |       |         |                 |                                 |
| All                 | 1.68  | 0.100 | 12.78 | 0.001 | 10.88   | 74.66           | MAT, MAP, TP                    |
| Dothideomycetes     | 1.83  | 0.053 | 14.95 | 0.001 | 7.18    | 76.04           | MAT, TN                         |
| Leotiomycetes       | 2.40  | 0.058 | 13.73 | 0.001 | 7.05    | 76.82           | MAP, MAT, TN, AK                |
| Sordariomycetes     | 1.17  | 0.090 | 13.19 | 0.001 | 6.44    | 79.21           | MAT, MAP                        |
| Eurotiomycetes      | 0.67  | 0.240 | 12.58 | 0.001 | 8.50    | 78.24           | MAT, TP                         |
| Basidiomycota       | 2.88  | 0.070 | 11.76 | 0.003 | 11.48   | 73.88           | MAT, AP                         |
| Chytridiomycota     | 1.20  | 0.043 | 5.81  | 0.002 | 3.01    | 89.97           | MAT, TN                         |
| Mortierellomycota   | 2.36  | 0.150 | 12.02 | 0.001 | 12.62   | 73.00           | MAT, pH, TP, AK, MAP            |
| <b>Protists</b>     |       |       |       |       |         |                 |                                 |
| All                 | 1.10  | 0.170 | 8.85  | 0.002 | 10.73   | 79.30           | MAT, MAP                        |
| Cercomonadidae      | 4.90  | 0.001 | 2.60  | 0.032 | 11.59   | 80.87           | pH, TK, TN, AK                  |
| Glissomonadida      | 2.50  | 0.250 | 25.51 | 0.001 | 19.92   | 52.05           | MAP, MAT                        |
| Imbricatea          | 3.04  | 0.032 | 6.38  | 0.001 | 3.67    | 86.91           | MAT, TN, AK                     |
| Ciliophora          | 1.18  | 0.180 | 5.71  | 0.005 | 8.22    | 84.88           | MAT, TP, MAP                    |
| Gracilipodida       | 5.77  | 0.010 | 10.59 | 0.001 | 12.59   | 71.05           | MAT, MAP, TN, pH                |
| Tubulinea           | 2.41  | 0.037 | 8.83  | 0.001 | 8.16    | 80.60           | MAT, TP                         |
| Schizoplasmodiida   | 2.43  | 0.049 | 3.85  | 0.046 | 2.90    | 90.82           | AK, AP                          |
| Bicosoecida         | 1.65  | 0.110 | 6.95  | 0.005 | 6.95    | 84.45           | MAT, AP                         |
| Discosea            | 4.31  | 0.001 | 19.47 | 0.001 | 7.25    | 68.97           | MAT, MAP                        |
| Labyrinthulomycetes | 7.25  | 0.001 | 4.63  | 0.003 | 3.28    | 84.84           | AP, pH                          |
| Ochrophyta          | 1.07  | 0.590 | 9.60  | 0.001 | 13.48   | 75.85           | MAT, MAP, TN, TP                |

Values correspond to the fractions explained ( $R^2$ ) by pure environmental (E), and spatial (S) effects, as well as combined effect (E&S). Significance of pure effects E, S and of the full model was obtained with 1000 Monte Carlo permutations. Intersection effects are not testable. Variables retained after the forward selection procedure are shown by order of contribution as determined by pRDA. The significance of each component via partitioning was evaluated with a permutation test.

**Supplementary Table 2.** Parameters and fits of null models across the 28 organism groups.

|                     | m     | m.ci  | m.mle | Rsqr | RMSE | AIC   | BIC   |
|---------------------|-------|-------|-------|------|------|-------|-------|
| <b>Bacteria</b>     |       |       |       |      |      |       |       |
| All                 | 0.089 | 0.003 | 0.090 | 0.49 | 0.15 | 22363 | 22378 |
| Actinobacteria      | 0.081 | 0.008 | 0.081 | 0.58 | 0.18 | -634  | -624  |
| Chloroflexi         | 0.068 | 0.004 | 0.068 | 0.48 | 0.14 | -2930 | -2918 |
| Gammaproteobacteria | 0.042 | 0.006 | 0.042 | 0.46 | 0.17 | -470  | -461  |
| Acidobacteria       | 0.084 | 0.009 | 0.084 | 0.47 | 0.17 | -600  | -590  |
| Alphaproteobacteria | 0.092 | 0.011 | 0.092 | 0.55 | 0.16 | -624  | -615  |
| Deltaproteobacteria | 0.211 | 0.022 | 0.211 | 0.65 | 0.14 | -845  | -836  |
| Bacteroidetes       | 0.043 | 0.007 | 0.043 | 0.46 | 0.15 | -527  | -518  |
| Planctomycetes      | 0.251 | 0.032 | 0.251 | 0.44 | 0.13 | -1389 | -1379 |
| Firmicutes          | 0.271 | 0.065 | 0.271 | 0.31 | 0.18 | -206  | -199  |
| Gemmatimonadetes    | 0.024 | 0.005 | 0.024 | 0.45 | 0.13 | -309  | -302  |
| <b>Fungi</b>        |       |       |       |      |      |       |       |
| All                 | 0.005 | 0.000 | 0.001 | 0.05 | 0.10 | 8308  | 8321  |
| Eurotiomycetes      | 0.004 | 0.001 | 0.004 | 0.00 | 0.14 | 2618  | 2625  |
| Mortierellomycota   | 0.002 | 0.000 | 0.000 | 0.04 | 0.18 | 2532  | 3540  |
| Sordariomycetes     | 0.001 | 0.000 | 0.001 | 0.12 | 0.12 | 964   | 972   |
| Basidiomycota       | 0.000 | 0.000 | 0.000 | 0.25 | 0.08 | 3616  | 3623  |
| Dothideomycetes     | 0.002 | 0.001 | 0.002 | 0.22 | 0.14 | -151  | -145  |
| Leotiomycetes       | 0.001 | 0.000 | 0.001 | 0.00 | 0.08 | 543   | 549   |
| Chytridiomycota     | 0.001 | 0.000 | 0.001 | 0.01 | 0.06 | 3791  | 3799  |
| <b>Protists</b>     |       |       |       |      |      |       |       |
| All                 | 0.023 | 0.002 | 0.776 | 0.14 | 0.16 | 10155 | 10168 |
| Cercozoa            | 0.043 | 0.004 | 0.747 | 0.32 | 0.16 | 3781  | 3792  |
| Ciliophora          | 0.011 | 0.003 | 0.853 | 0.02 | 0.18 | 940   | 948   |
| Schizoplasmodiida   | 0.030 | 0.006 | 0.251 | 0.35 | 0.16 | 3973  | 3981  |
| Gracilipodida       | 0.012 | 0.003 | 0.853 | 0.13 | 0.18 | 412   | 419   |
| Tubulinea           | 0.053 | 0.008 | 0.774 | 0.57 | 0.11 | 4132  | 4140  |
| Ochrophyta          | 0.008 | 0.003 | 0.836 | 0.03 | 0.15 | 375   | 381   |
| Bicosoecida         | 0.012 | 0.004 | 0.797 | 0.07 | 0.13 | 256   | 261   |
| Labyrinthulomycetes | 0.004 | 0.001 | 0.846 | 0.04 | 0.14 | 225   | 231   |
| Discosea            | 0.021 | 0.009 | 0.691 | 0.15 | 0.15 | 205   | 210   |
| Cercomonadidae      | 0.055 | 0.010 | 0.701 | 0.47 | 0.15 | 569   | 576   |
| Glissomonadida      | 0.078 | 0.010 | 0.703 | 0.46 | 0.15 | 1596  | 1605  |
| Imbricatea          | 0.010 | 0.003 | 0.047 | 0.08 | 0.17 | 367   | 373   |

$m$  is a single free parameter describing the migration rate, which is interpreted as the influence of drift and dispersal; m.ci and m.mle are the fitting parameters of  $m$ ; Rsqr, Root Mean Square Error (RMSE), Akaike information criterion (AIC), and Bayesian Information Criterion (BIC) are used to assess the overall fit of the model.
