# Supplementary material for: Organism body size structures the soil microbial and nematode community assembly at a continental and global scale
Source: PubMed Central journal article supplement (PMC7747634; doi:10.1038/s41467-020-20271-4), 2020-12-17
Supplement: 41467_2020_20271_MOESM2_ESM.pdf [file 41467_2020_20271_MOESM2_ESM.pdf]

## Description of Additional Supplementary Files

**File Name:** Supplementary Data 1

**Description:** Summary table of body sizes.
